# Supplementary material
Source: publisher site journal article supplement (http://www.degruyter.com/publication/journal_key/TNSCI/downloadAsset/TNSCI_CFP%20Neuroinflammation.pdf)
Supplement: Supplementary file 1 [file TNSCI_CFP%20Neuroinflammation.pdf]

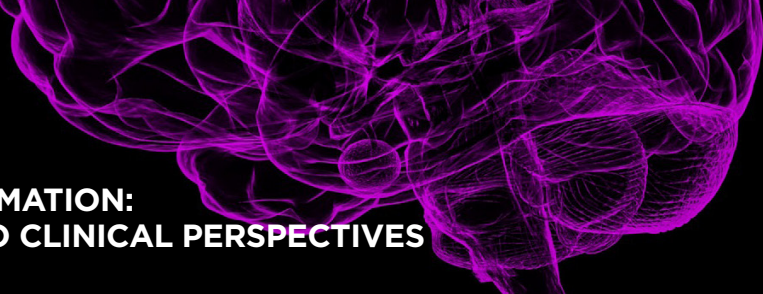

# NEUROINFLAMMATION: FROM BASIC TO CLINICAL PERSPECTIVES

## GUEST EDITORS

---

**Dr. Xiaolei Shi**, Yijishan Hospital, The First Affiliated Hospital of Wannan Medical College, Wuhu, China; email: [xlshi@wnmc.edu.cn](mailto:xlshi@wnmc.edu.cn)

**Dr. Chen Liang**, Department of Ophthalmology, West China Hospital, Si Chuan University, Chengdu, China; email: [liangchen@scu.edu.cn](mailto:liangchen@scu.edu.cn)

**Dr. Wang Liao**, Department of Neurology, Sun Yat-sen Memorial Hospital, Sun Yat-sen University, Guangzhou, China; email: [liao27@mail.sysu.edu.cn](mailto:liao27@mail.sysu.edu.cn)

## DESCRIPTION

---

Increasing evidences have pointed the implication of neuroinflammation in neurological diseases, including Alzheimer's Disease, stroke and multiple sclerosis. Cells, cytokines, and specific receptors act as generators and regulators of the complex immune response. For example, microglia mediate the phagocytosis of neuronal cells in brain, leading to cognitive decline. Inflammatory cytokines induce neuronal damage and participate in the pathology of neurodegenerative diseases. However, the precise mechanisms of neuroinflammation are still in debate.

Moreover, immune-based therapy has been supported for its potential in neurological disorders. It is believed that the modulation of immune responses in brain protects neurons. Modulating glia cells by changing their phenotype from pro-inflammatory to anti-inflammatory would be a possible way to treat neurological diseases. This research topic encourages submission of original papers and reviews concerning cellular and molecular mechanisms in neuroinflammation. We also welcome papers that focus on inflammation associated therapies for neurological diseases.

### Important date:

Submission of manuscripts: **January 1, 2020**

Deadline for new submissions: **September 1, 2020**

## HOW TO SUBMIT

---

Please contact **Dr. Xiaolei Shi**, [xlshi@wnmc.edu.cn](mailto:xlshi@wnmc.edu.cn) and Managing Editor – **Jędrzej Daszkiewicz** [jedrzej.daszkiewicz@degruyter.com](mailto:jedrzej.daszkiewicz@degruyter.com) to let know, you are going to submit a paper to Topical Issue.

After that feel free to register at our paper processing system, and submit your paper:  
<https://www.editorialmanager.com/tn/default.aspx>

In case of any questions please contact Guest Editor or Managing Editor.
